# Supplementary material for: Five New Species of the Lichen-Forming Fungal Genus Peltula from China
Source: MDPI journal article supplement (doi:10.3390/jof8020134), 2022-01-28
Supplement: s1 [file s1]

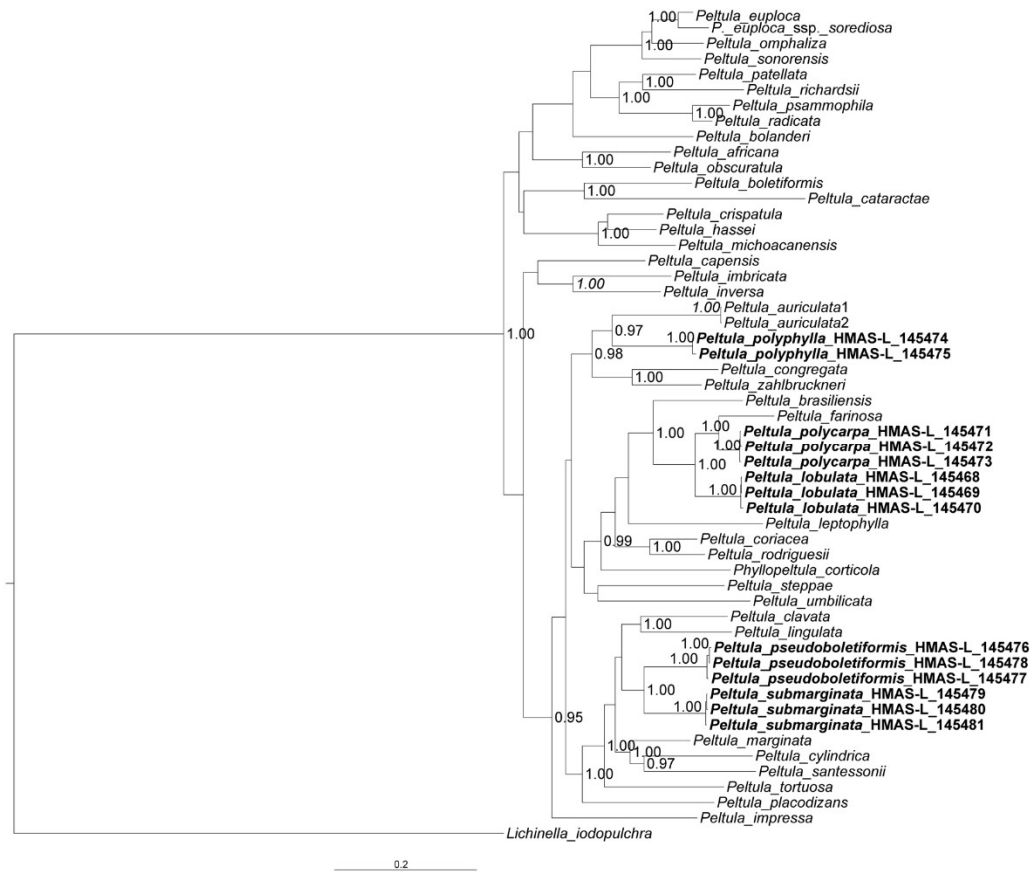

**Figure S1.** The Bayesian tree of *Peltula* species based on the concatenated ITS + nuSSU + nuLSU (three-gene) data set. The numbers in each node represent posterior probability (PP) values. Posterior probability values  $\geq 0.95$  were plotted on the branches of the MrBayes tree. The clades corresponding to the new species are in bold, which indicate that these sequences are newly generated for this study. Scale = 0.2 substitution per site.

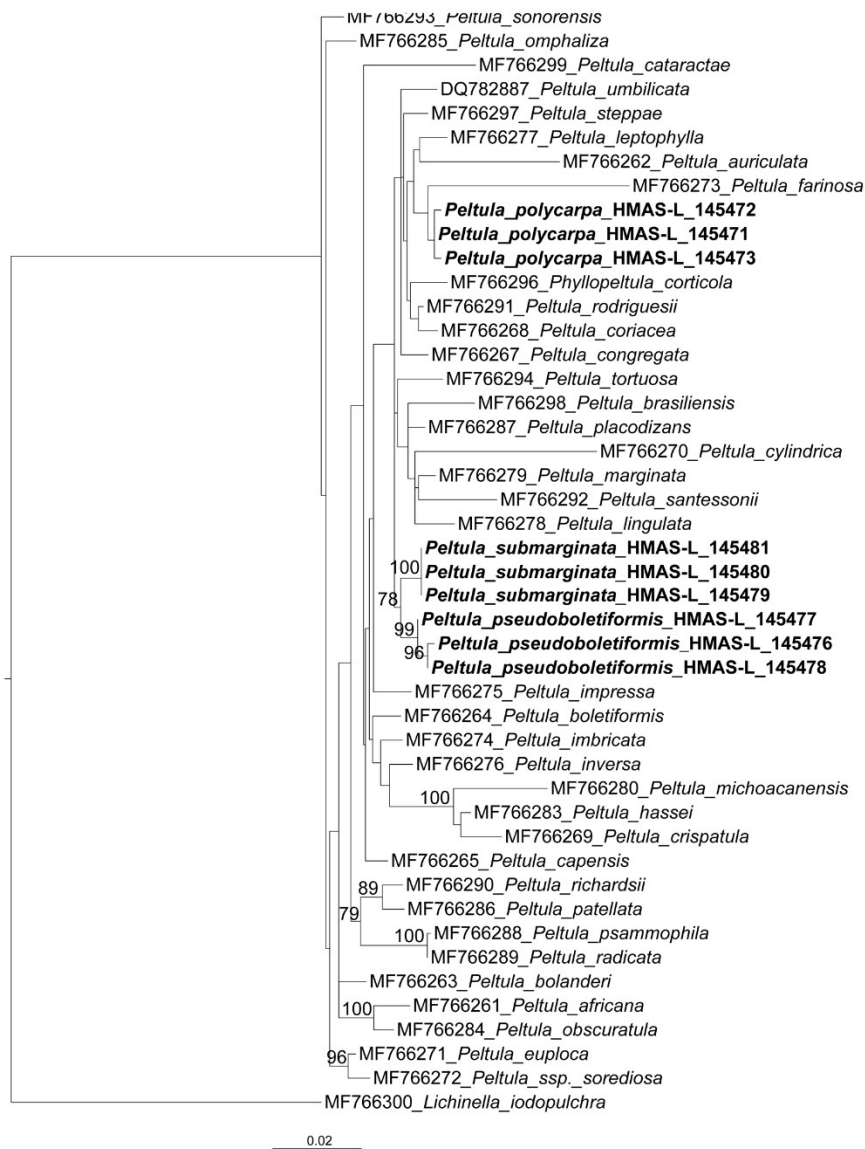

**Figure S2.** The maximum likelihood tree of *Peltula* species based on the nuSSU sequences. The numbers in each node represent bootstrap support (BS). Bootstrap values  $\geq 75$  were plotted on the branches of the RAxML tree. The clades corresponding to the new species are in bold, which indicate that these sequences are newly generated for this study. Scale = 0.02 substitution per site.

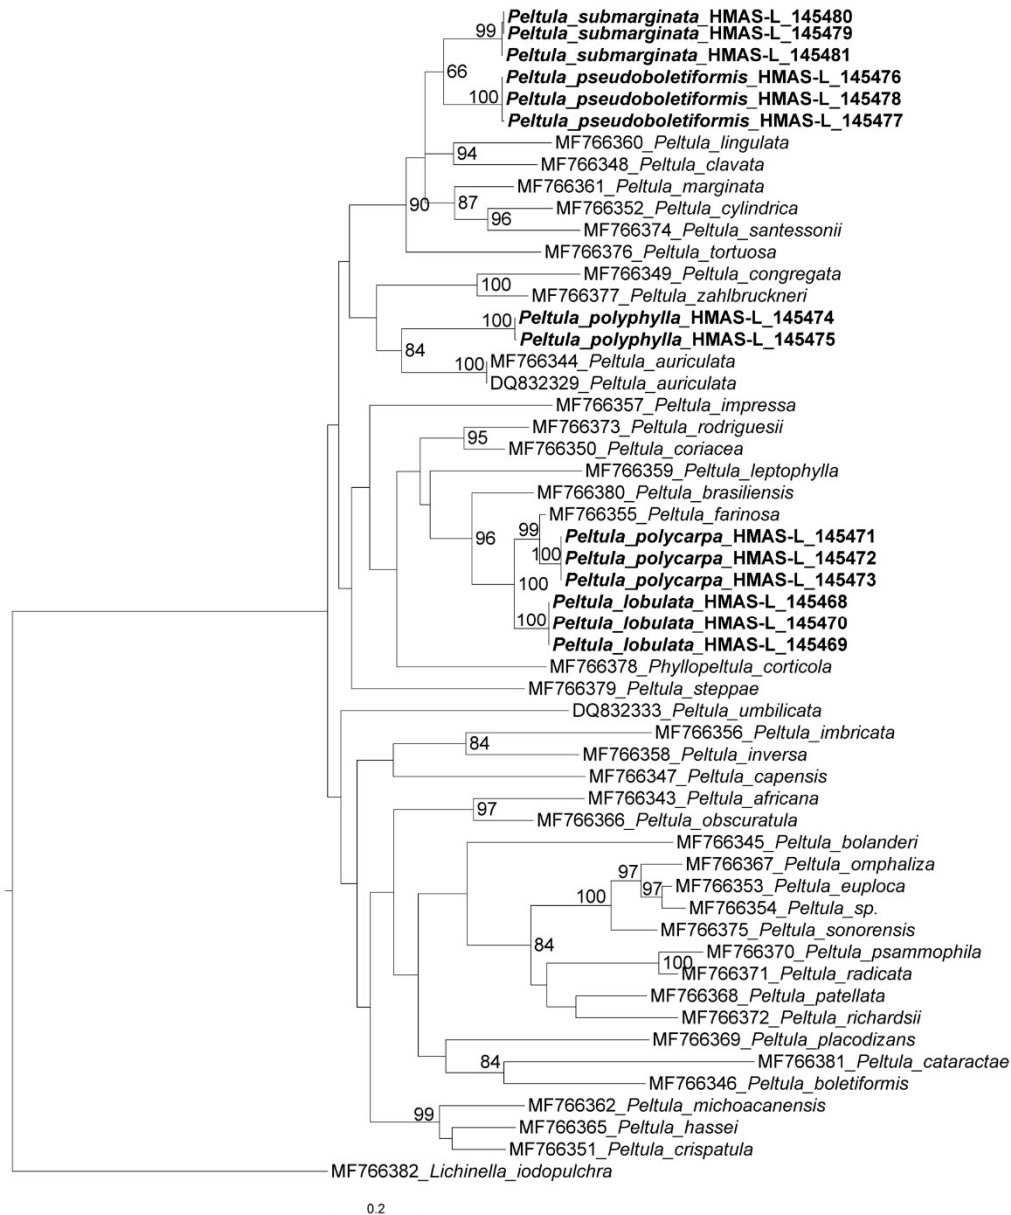

**Figure S3.** The maximum likelihood tree of *Peltula* species based on the ITS sequences. The numbers in each node represent bootstrap support (BS). Bootstrap values  $\geq 75$  were plotted on the branches of the RAxML tree. The clades corresponding to the new species are in bold, which indicate that these sequences are newly generated for this study. Scale = 0.2 substitution per site.

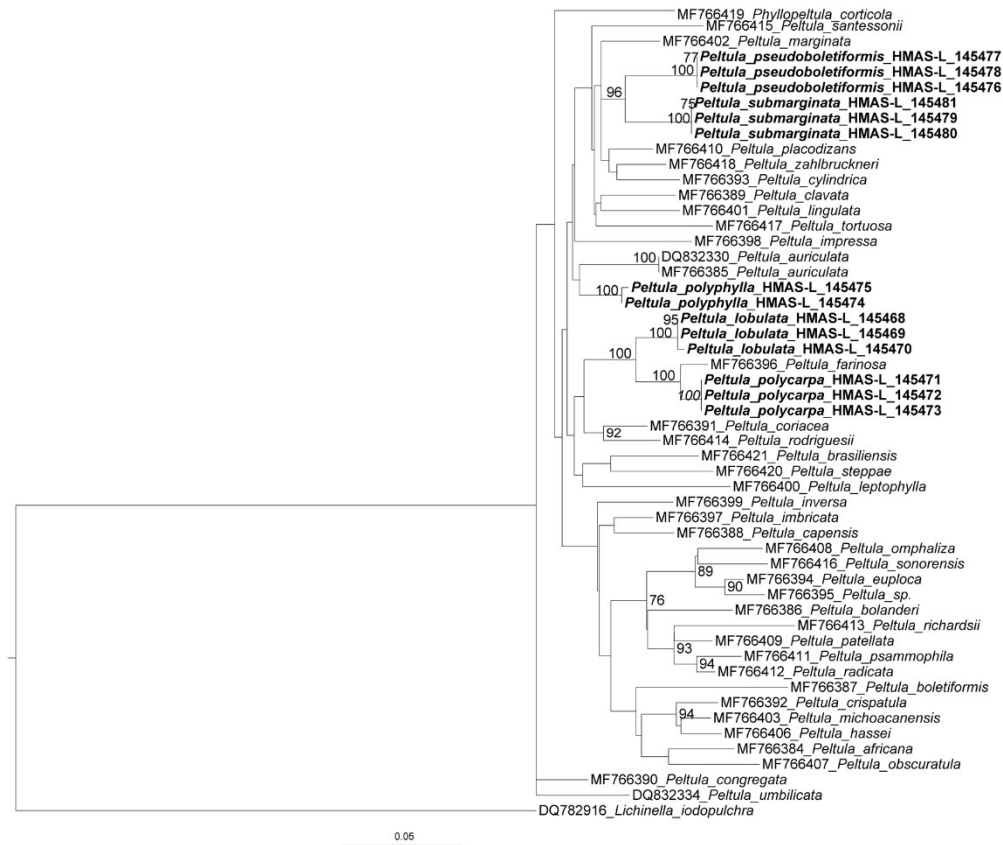

**Figure S4.** The maximum likelihood tree of *Peltula* species based on the nuLSU sequences. The numbers in each node represent bootstrap support (BS). Bootstrap values  $\geq 75$  were plotted on the branches of the RAxML tree. The clades corresponding to the new species are in bold, which indicate that these sequences are newly generated for this study. Scale = 0.05 substitution per site.

**Table S1.** ABGD species delimitation results

| Parameter settings | P0.001-0.1, X=0.5                                            | P0.001-0.01, X=1                                             |
|--------------------|--------------------------------------------------------------|--------------------------------------------------------------|
| Delimited species  | Group[ 1 ] n: 1 ;id: Lichinella_iodopulchra                  | Group[ 1 ] n: 1 ;id: Lichinella_iodopulchra                  |
|                    | Group[ 2 ] n: 1 ;id: P._euploca_ssp._sorediosa               | Group[ 2 ] n: 1 ;id: P._euploca_ssp._sorediosa               |
|                    | Group[ 3 ] n: 1 ;id: Peltula_africana                        | Group[ 3 ] n: 1 ;id: Peltula_africana                        |
|                    | Group[ 4 ] n: 2 ;id: Peltula_auriculata1 Peltula_auriculata2 | Group[ 4 ] n: 2 ;id: Peltula_auriculata1 Peltula_auriculata2 |
|                    | Group[ 5 ] n: 1 ;id: Peltula_bolanderi                       | Group[ 5 ] n: 1 ;id: Peltula_bolanderi                       |
|                    | Group[ 6 ] n: 1 ;id: Peltula_boletiformis                    | Group[ 6 ] n: 1 ;id: Peltula_boletiformis                    |
|                    | Group[ 7 ] n: 1 ;id: Peltula_brasiliensis                    | Group[ 7 ] n: 1 ;id: Peltula_brasiliensis                    |
|                    | Group[ 8 ] n: 1 ;id: Peltula_capensis                        | Group[ 8 ] n: 1 ;id: Peltula_capensis                        |
|                    | Group[ 9 ] n: 1 ;id: Peltula_cataractae                      | Group[ 9 ] n: 1 ;id: Peltula_cataractae                      |
|                    | Group[ 10 ] n: 1 ;id: Peltula_clavata                        | Group[ 10 ] n: 1 ;id: Peltula_clavata                        |
|                    | Group[ 11 ] n: 1 ;id: Peltula_congregata                     | Group[ 11 ] n: 1 ;id: Peltula_congregata                     |
|                    | Group[ 12 ] n: 1 ;id: Peltula_coriacea                       | Group[ 12 ] n: 1 ;id: Peltula_coriacea                       |
|                    | Group[ 13 ] n: 1 ;id: Peltula_crispatula                     | Group[ 13 ] n: 1 ;id: Peltula_crispatula                     |
|                    | Group[ 14 ] n: 1 ;id: Peltula_cylindrica                     | Group[ 14 ] n: 1 ;id: Peltula_cylindrica                     |
|                    | Group[ 15 ] n: 1 ;id: Peltula_euploca                        | Group[ 15 ] n: 1 ;id: Peltula_euploca                        |
|                    | Group[ 16 ] n: 1 ;id: Peltula_farinosa                       | Group[ 16 ] n: 1 ;id: Peltula_farinosa                       |
|                    | Group[ 17 ] n: 1 ;id: Peltula_hassei                         | Group[ 17 ] n: 1 ;id: Peltula_hassei                         |
|                    | Group[ 18 ] n: 1 ;id: Peltula_imbricata                      | Group[ 18 ] n: 1 ;id: Peltula_imbricata                      |
|                    | Group[ 19 ] n: 1 ;id: Peltula_impresa                        | Group[ 19 ] n: 1 ;id: Peltula_impresa                        |
|                    | Group[ 20 ] n: 1 ;id: Peltula_inversa                        | Group[ 20 ] n: 1 ;id: Peltula_inversa                        |

---

**Group[ 21 ] n: 1** ;id: Peltula\_leptophylla

**Group[ 22 ] n: 1** ;id: Peltula\_lingulata

**Group[ 23 ] n: 3** ;id: Peltula\_lobulata\_145468

Peltula\_lobulata\_145469 Peltula\_lobulata\_145470

**Group[ 24 ] n: 1** ;id: Peltula\_marginata

**Group[ 25 ] n: 1** ;id: Peltula\_michoacanensis

**Group[ 26 ] n: 1** ;id: Peltula\_obscuratula

**Group[ 27 ] n: 1** ;id: Peltula\_omphaliza

**Group[ 28 ] n: 1** ;id: Peltula\_patellata

**Group[ 29 ] n: 1** ;id: Peltula\_placodizans

**Group[ 30 ] n: 3** ;id: Peltula\_polycarpa\_145471

Peltula\_polycarpa\_145472 Peltula\_polycarpa\_145473

**Group[ 31 ] n: 2** ;id: Peltula\_polyphylla\_145474

Peltula\_polyphylla\_145475

**Group[ 32 ] n: 1** ;id: Peltula\_psammophila

**Group[ 33 ] n: 3** ;id: P.\_pseudoboletiformis\_145476

P.\_pseudoboletiformis\_145477 P.\_pseudoboletiformis\_145478

**Group[ 34 ] n: 1** ;id: Peltula\_radicata

**Group[ 35 ] n: 1** ;id: Peltula\_richardsii

**Group[ 36 ] n: 1** ;id: Peltula\_rodriguesii

**Group[ 37 ] n: 1** ;id: Peltula\_santessonii

**Group[ 38 ] n: 1** ;id: Peltula\_sonorensis

---

---

**Group[ 21 ] n: 1** ;id: Peltula\_leptophylla

**Group[ 22 ] n: 1** ;id: Peltula\_lingulata

**Group[ 23 ] n: 3** ;id: Peltula\_lobulata\_145468 Peltula\_lobulata\_145469

Peltula\_lobulata\_145470

**Group[ 24 ] n: 1** ;id: Peltula\_marginata

**Group[ 25 ] n: 1** ;id: Peltula\_michoacanensis

**Group[ 26 ] n: 1** ;id: Peltula\_obscuratula

**Group[ 27 ] n: 1** ;id: Peltula\_omphaliza

**Group[ 28 ] n: 1** ;id: Peltula\_patellata

**Group[ 29 ] n: 1** ;id: Peltula\_placodizans

**Group[ 30 ] n: 3** ;id: Peltula\_polycarpa\_145471 Peltula\_polycarpa\_145472

Peltula\_polycarpa\_145473

**Group[ 31 ] n: 2** ;id: Peltula\_polyphylla\_145474

Peltula\_polyphylla\_145475

**Group[ 32 ] n: 1** ;id: Peltula\_psammophila

**Group[ 33 ] n: 3** ;id: P.\_pseudoboletiformis\_145476

P.\_pseudoboletiformis\_145477 P.\_pseudoboletiformis\_145478

**Group[ 34 ] n: 1** ;id: Peltula\_radicata

**Group[ 35 ] n: 1** ;id: Peltula\_richardsii

**Group[ 36 ] n: 1** ;id: Peltula\_rodriguesii

**Group[ 37 ] n: 1** ;id: Peltula\_santessonii

**Group[ 38 ] n: 1** ;id: Peltula\_sonorensis

---

---

**Group[ 39 ] n: 1** ;id: Peltula\_steppae

**Group[ 40 ] n: 3** ;id: P.\_submarginata\_145479

P.\_submarginata\_145480 P.\_submarginata\_145481

**Group[ 41 ] n: 1** ;id: Peltula\_tortuosa

**Group[ 42 ] n: 1** ;id: Peltula\_umbilicata

**Group[ 43 ] n: 1** ;id: Peltula\_zahlbruckneri

**Group[ 44 ] n: 1** ;id: Phyllopeltula\_corticola

---

---

**Group[ 39 ] n: 1** ;id: Peltula\_steppae

**Group[ 40 ] n: 3** ;id: P.\_submarginata\_145479 P.\_submarginata\_145480

P.\_submarginata\_145481

**Group[ 41 ] n: 1** ;id: Peltula\_tortuosa

**Group[ 42 ] n: 1** ;id: Peltula\_umbilicata

**Group[ 43 ] n: 1** ;id: Peltula\_zahlbruckneri

**Group[ 44 ] n: 1** ;id: Phyllopeltula\_corticola

---

**Table S2.** bPTP species delimitation results based on Maximum Likelihood partition

| Species No. | Sample name                                          | Support |
|-------------|------------------------------------------------------|---------|
| 1           | Peltula_cataractae                                   | 1.000   |
| 2           | Peltula_steppae                                      | 1.000   |
| 3           | Peltula_umbilicata                                   | 1.000   |
| 4           | Peltula_impressa                                     | 1.000   |
| 5           | Peltula_boletiformis                                 | 1.000   |
| 6           | Peltula_leptophylla                                  | 1.000   |
| 7           | Phyllopeltula_corticola                              | 1.000   |
| 8           | Peltula_placodizans                                  | 1.000   |
| 9           | Peltula_bolanderi                                    | 1.000   |
| 10          | Peltula_tortuosa                                     | 1.000   |
| 11          | Peltula_cylindrica                                   | 1.000   |
| 12          | Peltula_santessonii                                  | 1.000   |
| 13          | Peltula_marginata                                    | 1.000   |
| 14          | Peltula_capensis                                     | 1.000   |
| 15          | Peltula_polyphylla_145475, Peltula_polyphylla_145474 | 0.824   |
| 16          | Peltula_auriculata2, Peltula_auriculata1             | 0.492   |
| 17          | Peltula_patellata                                    | 1.000   |
| 18          | Peltula_richardsii                                   | 1.000   |
| 19          | Peltula_inversa                                      | 1.000   |
| 20          | Peltula_imbricata                                    | 1.000   |
| 21          | Peltula_clavata                                      | 1.000   |
| 22          | Peltula_lingulata                                    | 1.000   |



|    |                                                                                                                                |       |
|----|--------------------------------------------------------------------------------------------------------------------------------|-------|
| 23 | <i>Peltula_brasiliensis</i>                                                                                                    | 1.000 |
| 24 | <i>Peltula_obscuratula</i>                                                                                                     | 1.000 |
| 25 | <i>Peltula_africana</i>                                                                                                        | 1.000 |
| 26 | <i>Peltula_zahlbruckneri</i>                                                                                                   | 1.000 |
| 27 | <i>Peltula_congregata</i>                                                                                                      | 1.000 |
| 28 | <i>Peltula_michoacanensis</i>                                                                                                  | 1.000 |
| 29 | <i>Peltula_pseudoboletiformis_145476</i> , <i>Peltula_pseudoboletiformis_145478</i> , <i>Peltula_pseudoboletiformis_145477</i> | 0.991 |
| 30 | <i>Peltula_submarginata_145480</i> , <i>Peltula_submarginata_145479</i> , <i>Peltula_submarginata_145481</i>                   | 0.882 |
| 31 | <i>Peltula_sonorensis</i>                                                                                                      | 1.000 |
| 32 | <i>Peltula_hassei</i>                                                                                                          | 1.000 |
| 33 | <i>Peltula_crispatula</i>                                                                                                      | 1.000 |
| 34 | <i>Peltula_rodriguesii</i>                                                                                                     | 1.000 |
| 35 | <i>Peltula_coriacea</i>                                                                                                        | 1.000 |
| 36 | <i>Peltula_polycarpa_145471</i> , <i>Peltula_polycarpa_145472</i> , <i>Peltula_polycarpa_145473</i>                            | 0.932 |
| 37 | <i>Peltula_farinosa</i>                                                                                                        | 0.999 |
| 38 | <i>Peltula_lobulata_145468</i> , <i>Peltula_lobulata_145469</i> , <i>Peltula_lobulata_145470</i>                               | 0.850 |
| 39 | <i>Peltula_omphaliza</i>                                                                                                       | 1.000 |
| 40 | <i>Peltula_radicata</i>                                                                                                        | 0.999 |
| 41 | <i>Peltula_psammophila</i>                                                                                                     | 0.999 |
| 42 | <i>Peltula_euploca_ssp._sorediosa</i>                                                                                          | 0.996 |
| 43 | <i>Peltula_euploca</i>                                                                                                         | 0.996 |

**Table S3.** GMYC species delimitation results

|                | Method                     | single                                   |
|----------------|----------------------------|------------------------------------------|
|                | Likelihood of null model   | 235.6642                                 |
| <b>Results</b> | Maximum likelihood of GMYC | 247.529                                  |
| <b>summary</b> | model                      |                                          |
|                | Likelihood ratio           | 23.72973                                 |
|                | Result of LR test          | 7.033232e-06***                          |
| No.            | Delimited species No.      | Sample name                              |
| 1              | 1                          | Peltula_auriculata1                      |
| 2              | 1                          | Peltula_auriculata2                      |
| 3              | 2                          | Peltula_polyphylla_HMAS_L_145474         |
| 4              | 2                          | Peltula_polyphylla_HMAS_L_145475         |
| 5              | 3                          | Peltula_polycarpa_HMAS_L_145473          |
| 6              | 3                          | Peltula_polycarpa_HMAS_L_145471          |
| 7              | 3                          | Peltula_polycarpa_HMAS_L_145472          |
| 8              | 4                          | Peltula_lobulata_HMAS_L_145470           |
| 9              | 4                          | Peltula_lobulata_HMAS_L_145468           |
| 10             | 4                          | Peltula_lobulata_HMAS_L_145469           |
| 11             | 5                          | Peltula_pseudoboletiformis_HMAS_L_145477 |
| 12             | 5                          | Peltula_pseudoboletiformis_HMAS_L_145476 |
| 13             | 5                          | Peltula_pseudoboletiformis_HMAS_L_145478 |
| 14             | 6                          | Peltula_submarginata_HMAS_L_145481       |
| 15             | 6                          | Peltula_submarginata_HMAS_L_145479       |
| 16             | 6                          | Peltula_submarginata_HMAS_L_145480       |
| 17             | 7                          | Lichinella_iodopulchra                   |
| 18             | 8                          | Peltula_euploca_ssp._sorediosa           |
| 19             | 9                          | Peltula_euploca                          |
| 20             | 10                         | Peltula_omphaliza                        |
| 21             | 11                         | Peltula_sonorensis                       |
| 22             | 12                         | Peltula_patellata                        |
| 23             | 13                         | Peltula_richardsii                       |
| 24             | 14                         | Peltula_psammophila                      |
| 25             | 15                         | Peltula_radicata                         |
| 26             | 16                         | Peltula_bolanderi                        |
| 27             | 17                         | Peltula_africana                         |
| 28             | 18                         | Peltula_obscuratula                      |
| 29             | 19                         | Peltula_crispatula                       |

---

|    |    |                                |
|----|----|--------------------------------|
| 30 | 20 | <i>Peltula_hassei</i>          |
| 31 | 21 | <i>Peltula_michoacanensis</i>  |
| 32 | 22 | <i>Peltula_boletiformis</i>    |
| 33 | 23 | <i>Peltula_cataractae</i>      |
| 34 | 24 | <i>Peltula_congregata</i>      |
| 35 | 25 | <i>Peltula_zahlbruckneri</i>   |
| 36 | 26 | <i>Peltula_umbilicata</i>      |
| 37 | 27 | <i>Peltula_brasiliensis</i>    |
| 38 | 28 | <i>Peltula_farinosa</i>        |
| 39 | 29 | <i>Peltula_coriacea</i>        |
| 40 | 30 | <i>Peltula_rodriguesii</i>     |
| 41 | 31 | <i>Phyllopeltula_corticola</i> |
| 42 | 32 | <i>Peltula_leptophylla</i>     |
| 43 | 33 | <i>Peltula_steppae</i>         |
| 44 | 34 | <i>Peltula_clavata</i>         |
| 45 | 35 | <i>Peltula_lingulata</i>       |
| 46 | 36 | <i>Peltula_cylindrica</i>      |
| 47 | 37 | <i>Peltula_santessonii</i>     |
| 48 | 38 | <i>Peltula_marginata</i>       |
| 49 | 39 | <i>Peltula_tortuosa</i>        |
| 50 | 40 | <i>Peltula_placodizans</i>     |
| 51 | 41 | <i>Peltula_impresa</i>         |
| 52 | 42 | <i>Peltula_capensis</i>        |
| 53 | 43 | <i>Peltula_imbricata</i>       |
| 54 | 44 | <i>Peltula_inversa</i>         |

---
